# Supplementary material for: Survival Motor Neuron (SMN) Protein Insufficiency Exacerbates Renal Ischemia/Reperfusion Injury
Source: PubMed Central journal article supplement (PMC6527877; doi:10.3389/fphys.2019.00559), 2019-05-14
Supplement: Image_1.pdf [file Image_1.pdf]

**Supplementary Figure  
Supplementary Figure 1.**

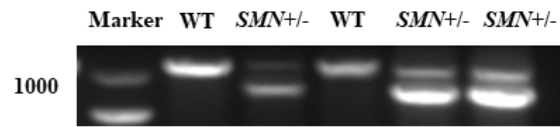

**Supplementary Figure 1. Genotyping of *SMN* mice.** PCR genotyping of the offspring from *SMN*<sup>+/-</sup> x *SMN*<sup>+/+</sup> with primers S1, S2 and H1.
